# Supplementary material for: Symmetry-breaking charge transfer and intersystem crossing in copper phthalocyanine thin films
Source: Royal Society of Chemistry journal article supplement (doi:10.1039/d2cp05240g), 2023-01-01
Supplement: d2cp05240g1.pdf [file d2cp05240g1.pdf]

## Electronic Supplementary Information

for

### Symmetry Breaking Charge Transfer and Intersystem Crossing in Copper Phthalocyanine Thin Films

Esther del Pino Rosendo,<sup>a</sup> Okan Yildiz,<sup>a</sup> Wojciech Pisula,<sup>a,b</sup> Tomasz Marszalek,<sup>a,b</sup> Paul W.M. Blom<sup>a</sup> and Charusheela Ramanan\*<sup>a,c</sup>

---

<sup>a</sup>Max Planck Institute for Polymer Research, Ackermannweg 10, 55128 Mainz, DE; <sup>b</sup> Department of Molecular Physics, Faculty of Chemistry, Lodz University of Technology, Zeromskiego 116, 90-924 Lodz, Poland; <sup>c</sup>Department of Physics and Astronomy, Faculty of Sciences, Vrije Universiteit Amsterdam, De Boelelaan 1081, 1081 HV Amsterdam, Netherlands  
E-mail: c.ramanan@vu.nl

The excitation density for TA measurements is calculated as follows:

$$\rho = \alpha \cdot \frac{P_{in}}{E_{\gamma}} [cm^{-3}] \quad (1)$$

Where the absorption coefficient,  $\alpha$  (Equation 2), depends on the measured absorption, which is wavelength dependent, *Abs*, in O.D., see Figure 1, and on the thickness of the sample, in this case, 50 nm:

$$\alpha = \frac{Abs(\lambda)}{l} \cdot 10^7 [cm^{-1}] \quad (2)$$

The incident power per pulse,  $P_{in}$  (Equation 3) is calculated from the measurement of the incident pump power  $P_{pump}$ , adjusted with a gradient neutral density filter, the laser repetition rate = 1 kHz, and the measured pump-beam radius,  $r$ :

$$P_{in} = \frac{P_{pump}[\mu W]}{RR \cdot \pi r^2} [J \cdot cm^{-2} \text{ per pulse}] \quad (3)$$

The photon energy,  $E_{\gamma}$  (Equation 4), for each wavelength measured in nm, using Planck's constant and the speed of light:

$$E_{\gamma} = h \cdot \frac{c}{\lambda} [J/\gamma] \quad (4)$$

**Table S1. Excitation density at each excitation wavelength for the  $\alpha$ -CuPc thin film.**

| Wavelength (nm)                 | 580                | 620                | 680                | 720                |
|---------------------------------|--------------------|--------------------|--------------------|--------------------|
| Ex. Density (cm <sup>-3</sup> ) | 1·10 <sup>18</sup> | 1·10 <sup>18</sup> | 8·10 <sup>17</sup> | 9·10 <sup>17</sup> |

**Table S2. Excitation density at each excitation wavelength for the  $\beta$ -CuPc thin film.**

| Wavelength (nm)                  | 580               | 620               | 680               | 720               |
|----------------------------------|-------------------|-------------------|-------------------|-------------------|
| Ex. Density ( $\text{cm}^{-3}$ ) | $2 \cdot 10^{18}$ | $2 \cdot 10^{18}$ | $7 \cdot 10^{18}$ | $4 \cdot 10^{18}$ |

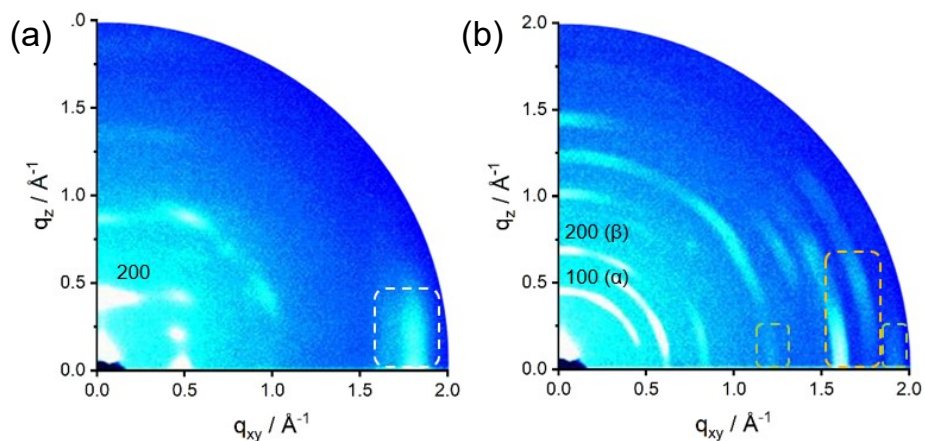

**Figure S1.** GIWAXS patterns of (a)  $\alpha$ -CuPc (as-deposited) and (b)  $\beta$ -CuPc (annealed) thin films. Only the major reflection of the phases are assigned by the Miller index, while dashed boxes indicate reflections related to intracolumnar CuPc packing (white –  $\alpha$ -herringbone, orange –  $\alpha$ -brickstone, green –  $\beta$ -phase).

The as-deposited film reveals a characteristic  $\alpha$ -herringbone structure (J. Am. Chem. Soc. 2012, 134, 14302–14305) with CuPc molecules arranged perpendicular to the substrate (Figure S1a). As indicated by the wide-angle reflections (white dashed box in Figure S1a), the molecules are in-plane shifted towards each other resulting in an interplanar distance of 3.45  $\text{\AA}$  and Cu-Cu distance of 3.75  $\text{\AA}$ . After annealing, the scattering intensities form arcs due to a broader orientation of the crystallites towards the surface (Figure S1b). Furthermore, the coexistence of two phases is identified based on the assignment of the reflections. New wide-angle reflections (orange dashed box in Figure S1b) are characteristic for the  $\alpha$ -brickstone structure with interplanar and Cu-Cu distances of 3.49  $\text{\AA}$  and 3.85  $\text{\AA}$ , respectively, as well as a CuPc tilt angle of 75° with respect to the surface. Additionally, reflections for the  $\beta$ -phase are found in which the CuPc adapt a larger molecular displacement in the stacks resulting in Cu-Cu distance of 4.95  $\text{\AA}$  and interplanar distance 3.30  $\text{\AA}$  (green boxes in Figure S1b).

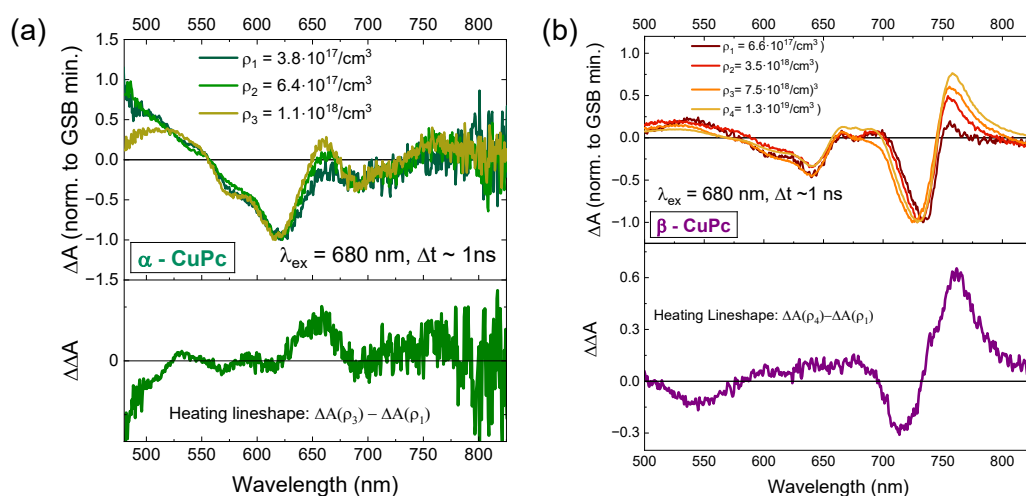

**Figure S2.** TA measurements with increasing excitation density are used to elucidate the  $\Delta A$  signal that arises due to local heating effects for (a)  $\alpha$ -CuPc and (b)  $\beta$ -CuPc thin films.

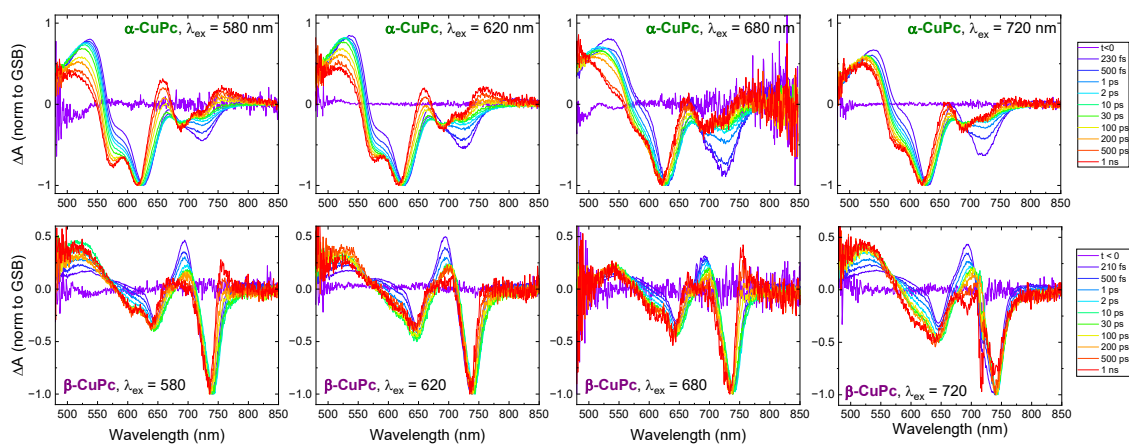

**Figure S3.** Normalised spectral traces at selected delay times for  $\alpha$ -CuPc and  $\beta$ -CuPc thin films indicate that heating artefacts, evidenced by the blue shifting of the GSB and appearance of other features shown in Figure S1, appear later delay times ( $> 100$  ps).

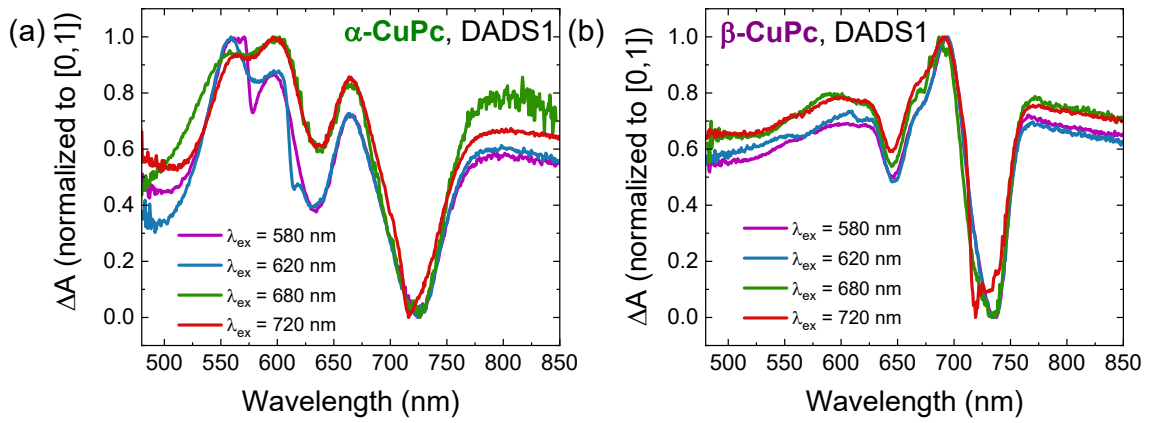

**Figure S4.** Comparison of Decay-Associated Difference Spectra for (a)  $\alpha$ -CuPc and (b)  $\beta$ -CuPc thin films show an excitation dependent lineshape between 550-600 nm for  $\alpha$ -CuPc that does not appear for  $\beta$ -CuPc

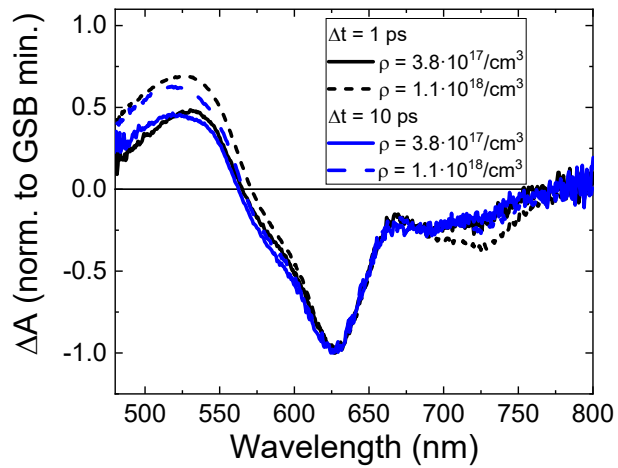

**Figure S5.** The spectral lineshape at  $\Delta t = 1$  ps and 10 ps for  $\alpha$ -CuPc at different excitation densities are similar, further confirming that the excitation wavelength dependent feature is not a heating artefact.
